# Supplementary material
Source: Research Square preprint supplement (doi:10.21203/rs.3.rs-8995796/v1)
Supplement: Supplementary file 1 [file 353639f330294d37af8fde92.docx]

**SUPPLEMENTARY FILE I**

**SECTION A: Demographic Data**

1. Gender: Male ( ), Female ( )
2. Educational Qualification: DN ( ), B.NSc ( ), M.Sc ( ) PhD ( )
3. Professional Qualification: RN ( ), NANNM ( ), NNA ( ), APHP ( ), ANNE ( ) Others ( )
4. Working Experience: Below 5 years ( ), 5 – 8 years ( ), 9 -11 years ( ), 12 years and above ( )
5. Rank: NOII ( ), NOI ( ), SNO ( ), PNO ( ), ACNO ( ), CNO ( ), DDNS ( ) DNS ( )
6. Unit: UTI ( ), SSI ( ), TB ( ) BBI ( ), SI ( ), GTI ( ) Others ( )

**SECTION B: Training and Prevention Practices Questionnaire (TPPQ)**

Please read through the statements below and tick the boxes that correspond to your choice. The options available are: Strongly Agree (SA), Agree (A), Disagree (D) and Strongly Disagree (SD)

| **S/N** | **ITEMS** | **SA** | **A** | **D** | **SD** |
| --- | --- | --- | --- | --- | --- |
| **A** | **Training** | | | | |
| **1** | General nursing education does not influence my ability to prevent hospital-acquired infections (HAIs) |  |  |  |  |
| **2** | On-the-job nursing training program influence my professional knowledge through active participation in continuing education |  |  |  |  |
| **3** | A low attitude towards on-the-job practical training affects my professional practices |  |  |  |  |
| **4** | The reforms of nursing education training program enable adequate knowledge of infection controls |  |  |  |  |
| **5** | I prefer to receive on-the-job nursing training on infection control than general nursing |  |  |  |  |

**SECTION C: Hospital Acquired Infections Practitional Questionnaire (HAIPsQ)**

| **S/N** | **Items** | **Nurses** | | **Others** | |
| --- | --- | --- | --- | --- | --- |
| **Yes** | **No** | **Yes** | **No** |
| **1** | Do you have infection control policies and guidelines in your unit? |  |  |  |  |
| **2** | Have you been receiving training or orientation about infection prevention and control? |  |  |  |  |
| **3** | Do you have active infection control team in your hospital? |  |  |  |  |
| **4** | Do you have an emerging infectious diseases task force dealing with outbreaks? |  |  |  |  |
| **5** | Have you encountered any outbreak in your hospital? |  |  |  |  |
| **6** | Is your hospital enrolled in national surveillance system? |  |  |  |  |
| **7** | Do you have a list of reportable infectious agents available in your unit and accessible to all staff? |  |  |  |  |
| **8** | Do you think your hospital prepared for any infection outbreak? |  |  |  |  |
| **9** | Do you agree that surveillance tool used in your hospital is effective to prevent or control infection? |  |  |  |  |
| **10** | Are staffs in your unit following infection control policies, rules and guidelines? |  |  |  |  |
