# Supplementary material
Source: Research Square preprint supplement (doi:10.21203/rs.3.rs-8995796/v1)
Supplement: Supplementary file 2 [file ce29930027c486229a27515d.docx]

**SUPPLEMENTARY FILE II**

Reliability and Validity Statistics of the Research Instrument

| Section | Cronbach’s Alpha | KMO Measure | Bartlett’s Chi-square (χ²) |
| --- | --- | --- | --- |
| TPPQ (Prevention Strategies) | 0.755 | 0.912 | 2820.76 |
| HAIPsQ (HAI Practices) | 0.933 | 0.912 | 2820.76 |

Note. KMO = Kaiser–Meyer–Olkin Measure of Sampling Adequacy; Bartlett’s Test p < 0.001.
